# Supplementary material
Source: HighWire-hosted journal article supplement (http://www.ajnr.org/highwire/filestream/52189/field_highwire_adjunct_files/0/0937_table.pdf)
Supplement: 0937_table.pdf [file 0937_table.pdf]

**On-line Table. Seventeen cases of PHACES association**

| Patient No./Sex | Hemangioma | Structural                                                                                                                                                        |            | Cerebrovascular                                                                                                                                                                                                       | Neurologic Sequelae                                                                                 | Cardiovascular                            | Eye                                                           | Ventral Anomaly                                                                                                                | Other                                    |
|-----------------|------------|-------------------------------------------------------------------------------------------------------------------------------------------------------------------|------------|-----------------------------------------------------------------------------------------------------------------------------------------------------------------------------------------------------------------------|-----------------------------------------------------------------------------------------------------|-------------------------------------------|---------------------------------------------------------------|--------------------------------------------------------------------------------------------------------------------------------|------------------------------------------|
|                 |            | Malformation                                                                                                                                                      | Structural |                                                                                                                                                                                                                       |                                                                                                     |                                           |                                                               |                                                                                                                                |                                          |
| 1/Female        | S1-S4      | L cerebellar hypoplasia; cerebellar dysplasia L > R; polygyric L occipital cortex                                                                                 |            | Tortuous and narrowed L ICA; tortuous basilar artery; pial enhancement of anterior pons and superior L cerebellum                                                                                                     | N                                                                                                   | N                                         | N                                                             | Sternal indentation; duplicated ossification of sternal centers; clefting nares, philtrum, upper lip ipsilateral to hemangioma | N                                        |
| 2/Male          | S1-S4      | Dandy-Walker malformation; R cerebellar hypoplasia; agenesis of corpus callosum; cerebellar dysplasia with polymicrogyria; L posterior parietal cleft             |            | Absent intracranial R ICA; tortuous PcomA                                                                                                                                                                             | R hearing loss; hydrocephalus requiring VP shunt; global dev. delay; R visual loss; axial hypotonia | N                                         | N                                                             | Cleft soft palate                                                                                                              | L inguinal hernia                        |
| 3/Male          | S1-S4      | Dandy-Walker variant; L cerebellar hypoplasia; prominent Meckel cave                                                                                              |            | Hypoplastic L A1 ACA segment; mild narrowing of L ICA at origin                                                                                                                                                       | N                                                                                                   | N                                         | N                                                             | Cleft lip                                                                                                                      | N                                        |
| 4/Female        | S1-S3      | L cerebral atrophy; L cortical dysplasia with pachygyria; focal nodular heterotopia in L parietal lobe; hypoplastic L cerebellar hemisphere; Dandy-Walker variant |            | Anomalous vessel at petrous segment of L ICA                                                                                                                                                                          | Seizure at 6 weeks; global dev. delay (language > motor); conductive hearing loss on L              | N                                         | N                                                             | N                                                                                                                              | N                                        |
| 5/Female        | S3         | N                                                                                                                                                                 |            | N                                                                                                                                                                                                                     | N                                                                                                   | N                                         | N                                                             | Sternal skin tag                                                                                                               | Liver hemangiomas; subglottic hemangioma |
| 6/Female        | S3         | N                                                                                                                                                                 |            | N                                                                                                                                                                                                                     | N                                                                                                   | N                                         | N                                                             | Tetralogy of Fallot, R aortic arch;                                                                                            | Hypopigmented midline; sternal skin tag  |
| 7/Female        | S1-S3      | Dandy-Walker variant; R cerebellar hypoplasia                                                                                                                     |            | L PCA aneurysm; embryologic vessels (scapular artery b/, prostatic), aberrant ICA course b/; tortuous R ICA                                                                                                           | Dev. delay                                                                                          | VSD R aortic arch                         | R cataract contralateral to facial hemangioma                 | Congenital hypothyroidism                                                                                                      | Subglottic hemangioma                    |
| 8/Female        | S3         | N                                                                                                                                                                 |            | N                                                                                                                                                                                                                     | N                                                                                                   | Common brachiocephalic trunk variant      | N                                                             | Sternal hemangiomas; sinus track over sternum                                                                                  | Upper airway hemangioma                  |
| 9/Female        | S1, S4     | N                                                                                                                                                                 |            | N                                                                                                                                                                                                                     | N                                                                                                   | L subclavian artery from descending aorta | N                                                             | Sternal skin tag; hypersegmented sternum                                                                                       | N                                        |
| 10/Female       | S3         | N                                                                                                                                                                 |            | N                                                                                                                                                                                                                     | N                                                                                                   | N                                         | N                                                             | Sternal skin tag; supraumbilical raphe; duplication of ossification centers                                                    | N                                        |
| 11/Female       | S1         | N                                                                                                                                                                 |            | Persistent L trigeminal artery; L A1 ACA segment hypoplasia; basilar artery narrowing                                                                                                                                 | N                                                                                                   | N                                         | N                                                             | N                                                                                                                              | N                                        |
| 12/Female       | S2, S3     | N                                                                                                                                                                 |            | Tortuous L common carotid artery; tortuous and ectatic; L ICA, L PcomA, L PCA, vertebrabasilar system, R PCA; hypoplasia and tortuous A1 ACA segment                                                                  | Mild gross motor delay                                                                              | Mild diminution of aortic arch            | N                                                             | Irregular ossification center and no center for 4th sternal segment; midline hypopigmentation                                  | Subglottic hemangioma                    |
| 13/Female       | S1, S2     | Hypoplastic corpus callosum; L temporal horn prominence; R perisylvian arachnoid cyst                                                                             |            | Tortuous L carotid artery; anomalous vessel from distal R ICA; intracranial hemangioma anterior to R cerebral peduncle; multiple anomalous vessels near intracranial hemangiomas; pial enhancement of R temporal lobe | N                                                                                                   | N                                         | N                                                             | Clefting nares, philtrum, upper lip ipsilateral to hemangioma                                                                  | N                                        |
| 14/Female       | S1, S2     | R cerebellar hypoplasia and dysplasia; Dandy-Walker variant; heterotopia in R cerebellum                                                                          |            | Absent R ICA; anomalous vessel from R PCA                                                                                                                                                                             | Seizure at 4 years                                                                                  | N                                         | N                                                             | N                                                                                                                              | N                                        |
| 15/Female       | S3         | N                                                                                                                                                                 |            | Tortuous vertebral artery b/; hypoplasia of L A1 ACA; mild narrowing of L ICA;                                                                                                                                        | N                                                                                                   | N                                         | N                                                             | N                                                                                                                              | N                                        |
| 16/Female       | S1-S4      | L posterior fossa asymmetry; prominence of L Meckel cave                                                                                                          |            | Low bifurcation of L carotid artery; tortuous and dysplastic L ICA and distal basilar artery; anomalous tortuous vessel from basilar artery                                                                           | N                                                                                                   | N                                         | N                                                             | N                                                                                                                              | N                                        |
| 17/Female       | S1-S4      | N                                                                                                                                                                 |            | Small L ICA; hypoplasia of L A1 ACA                                                                                                                                                                                   | N                                                                                                   | N                                         | Morning glory disk anomaly contralateral to facial hemangioma | N                                                                                                                              | N                                        |

**Note:**—N indicates none; dev., developmental; L, left; R, right; PcomA, posterior communicating artery; VP, ventriculoperitoneal; VSD, ventricular septal defect; PCA, posterior cerebral artery; b/, bilateral; ACA, anterior cerebral artery; ICA, internal carotid artery.
